# Supplementary material for: Solution-mediated phase transformation of uric acid dihydrate
Source: Royal Society of Chemistry journal article supplement (doi:10.1039/c4ce00574k), 2014-01-01
Supplement: c4ce00574k1.pdf [file c4ce00574k1.pdf]

## Supporting Information

### Solution-Mediated Phase Transformation of Uric Acid Dihydrate

Janeth B. Presores and Jennifer A. Swift\*

- Fig S1.** (Top) Packing diagram of UAD viewed along the *b*-axis, and (Bottom) viewed along the *c*-axis, constructed from fractional coordinates in refcode: ZZZPPI02.
- Fig S2.** (Top) Crystal packing diagram of anhydrous uric acid (UA) viewed along the *c*-axis, and (Bottom) viewed along the *a*-axis, constructed from fractional coordinates in refcode: URICAC.
- Fig S3.** PXRD patterns of the transformation of UAD in pH 7 McIlvaine buffer at 37° C. The diffraction patterns at 6-12 h showed reflections corresponding to UAD. After 18 h, diffraction lines corresponded exclusively to monosodium urate monohydrate (MSU).

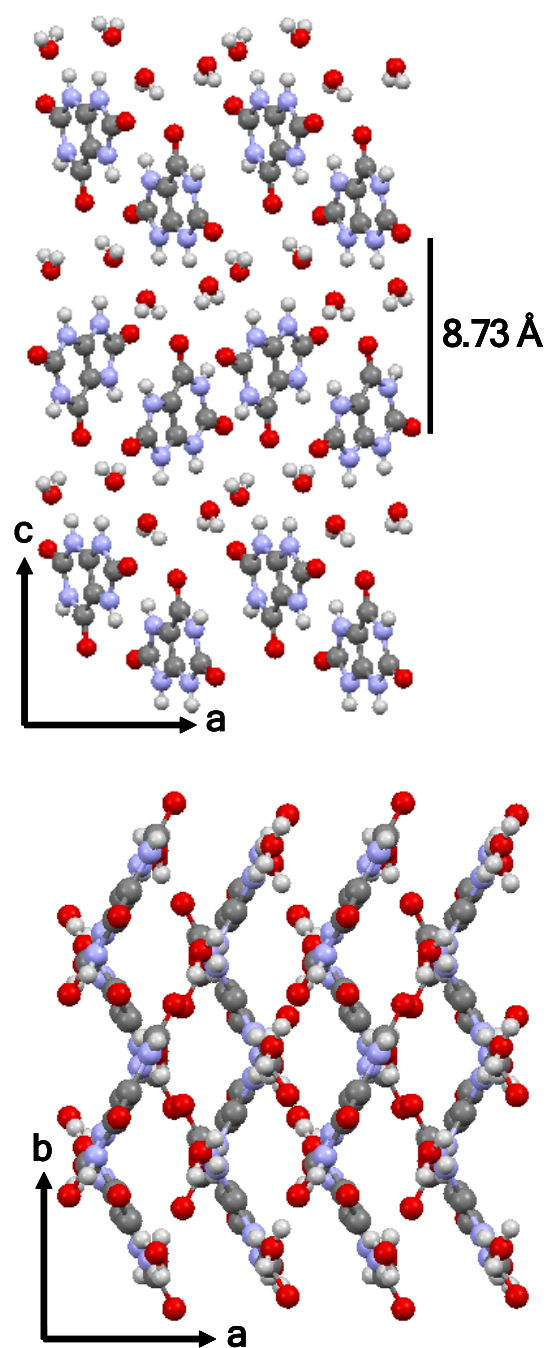

**Fig S1.** (Top) Packing diagram of UAD viewed along the *b*-axis, and (Bottom) viewed along the *c*-axis, constructed from fractional coordinates in refcode: ZZZPPI02.

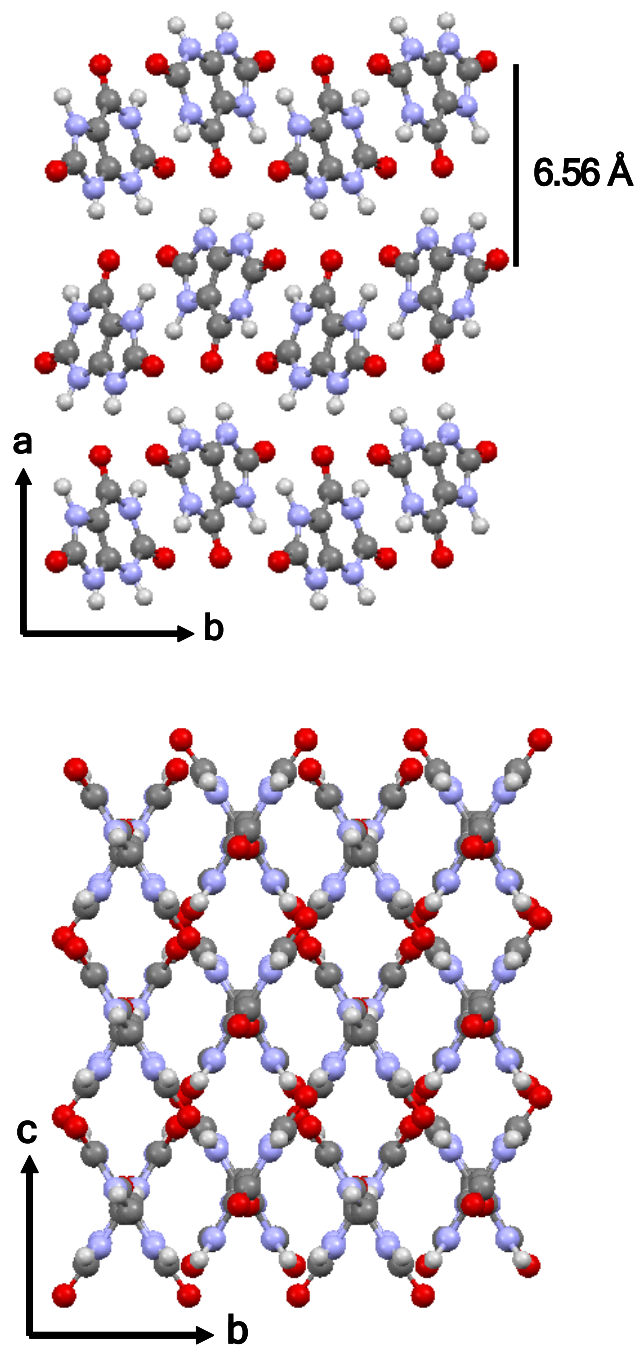

**Fig S2.** (Top) Crystal packing diagram of anhydrous uric acid (UA) viewed along the *c*-axis, and (Bottom) viewed along the *a*-axis, constructed from fractional coordinates in refcode: URICAC.

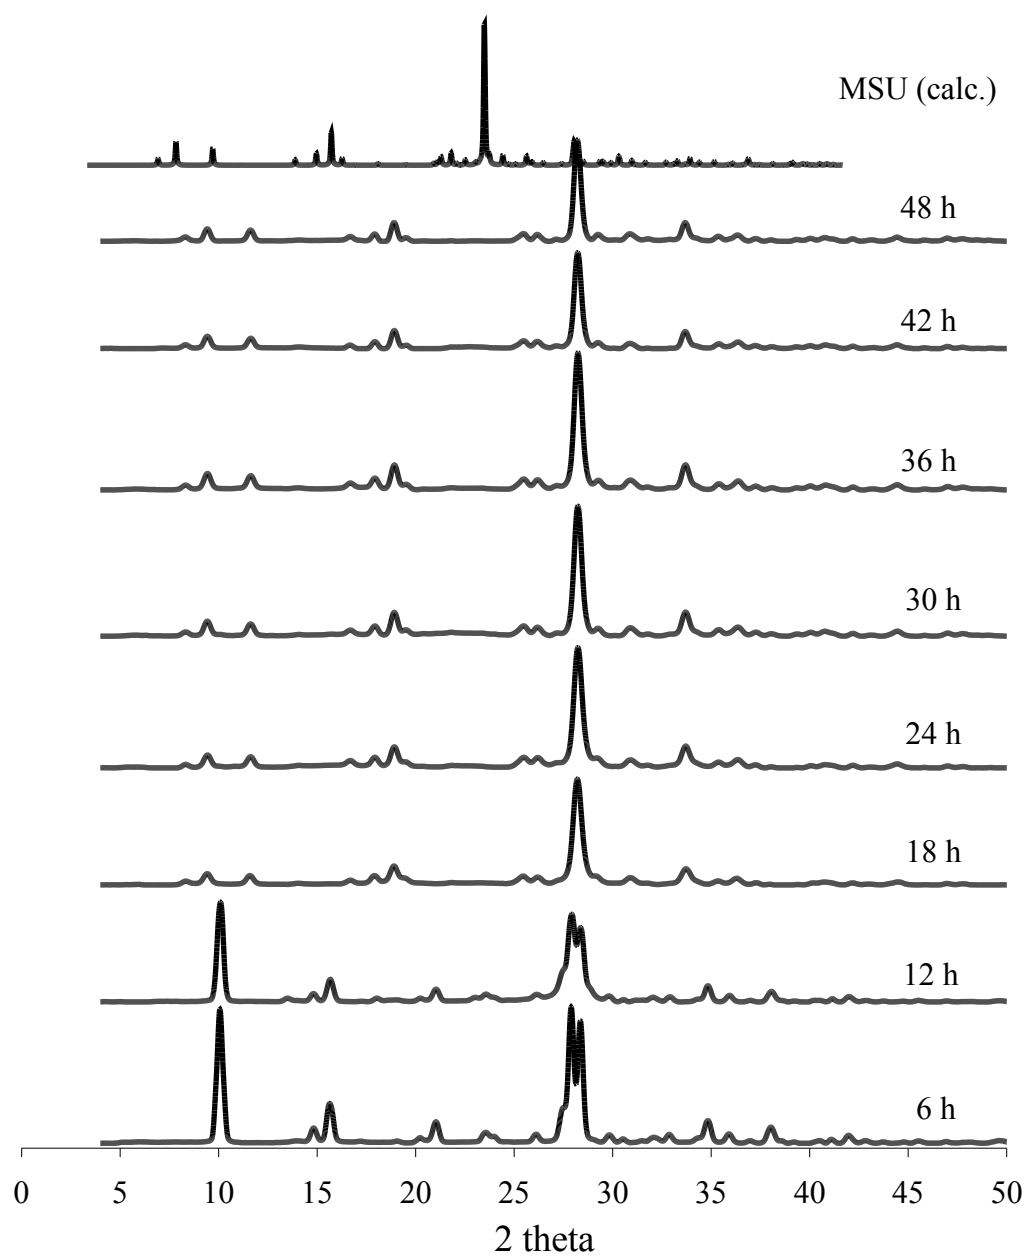

**Fig S3.** PXRD patterns of the transformation of UAD in pH 7 McIlvaine buffer at 37° C. The diffraction patterns at 6-12 h showed reflections corresponding to UAD. After 18 h, diffraction lines corresponded exclusively to monosodium urate monohydrate (MSU).
